# Supplementary material for: Integrative analysis of blood transcriptome profiles in small-cell lung cancer patients for identification of novel chemotherapy resistance-related biomarkers
Source: PubMed Central journal article supplement (PMC11217175; doi:10.3389/fimmu.2024.1338162), 2024-06-18
Supplement: Presentation_1.pdf [file Presentation_1.pdf]

## Supplementary material

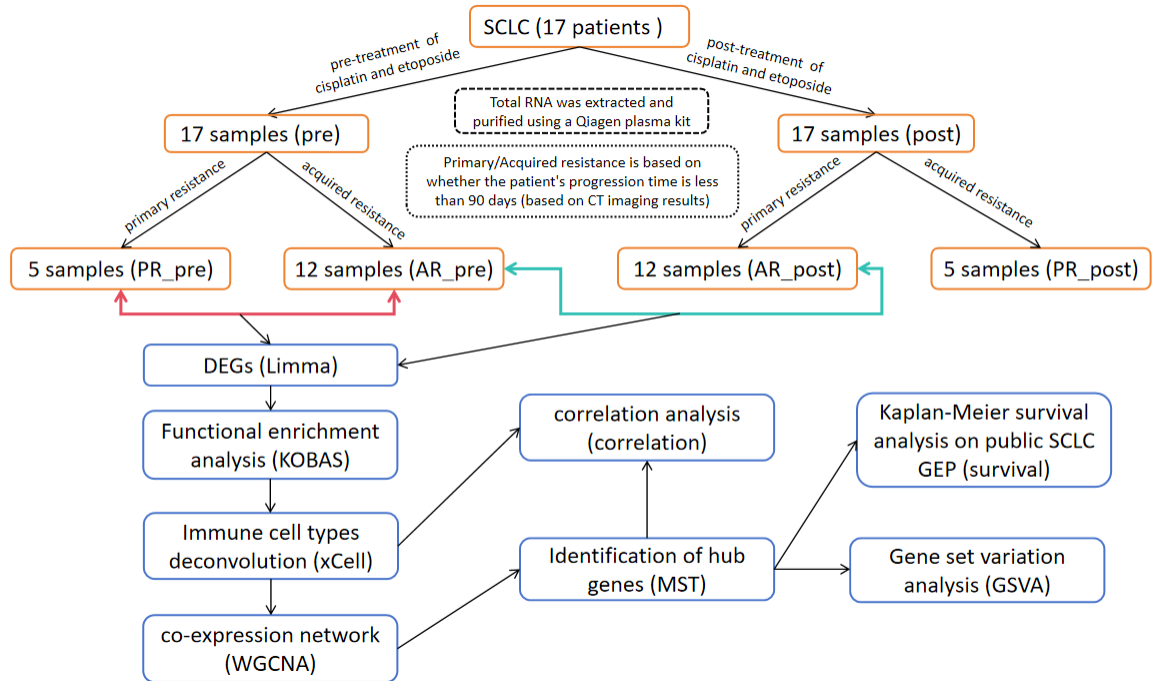

**Supplementary Figure S1.** The technical roadmap of the entire document.

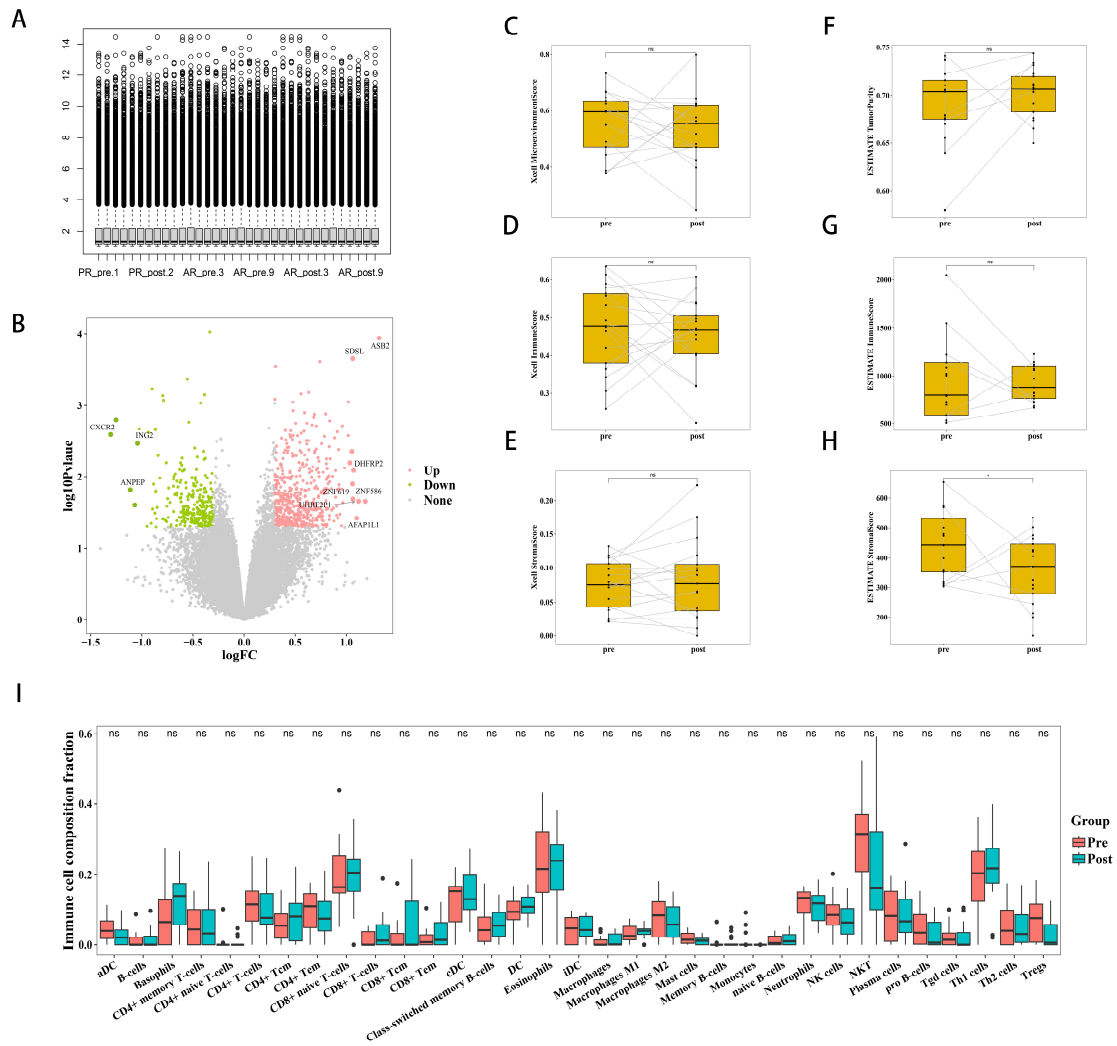

**Supplementary Figure S2.** (A) Histogram of gene expression for patients after batch correction. (B) Volcano plots showing differences between pre- and post-EP treatment groups. (C-E) Boxplot showing xCell enrichment microenvironment, stromal, and immune scores between pre- and post-EP treatment groups. (F-G) Boxplot showing ESTIMATE enrichment tumor purity, immune, and stromal scores between pre- and post-EP treatment groups. (I) Boxplot showing xCell enrichment scores of 33 immune cells between pre- and post-EP treatment groups. \* p-value < 0.05 and ns indicates not significant.

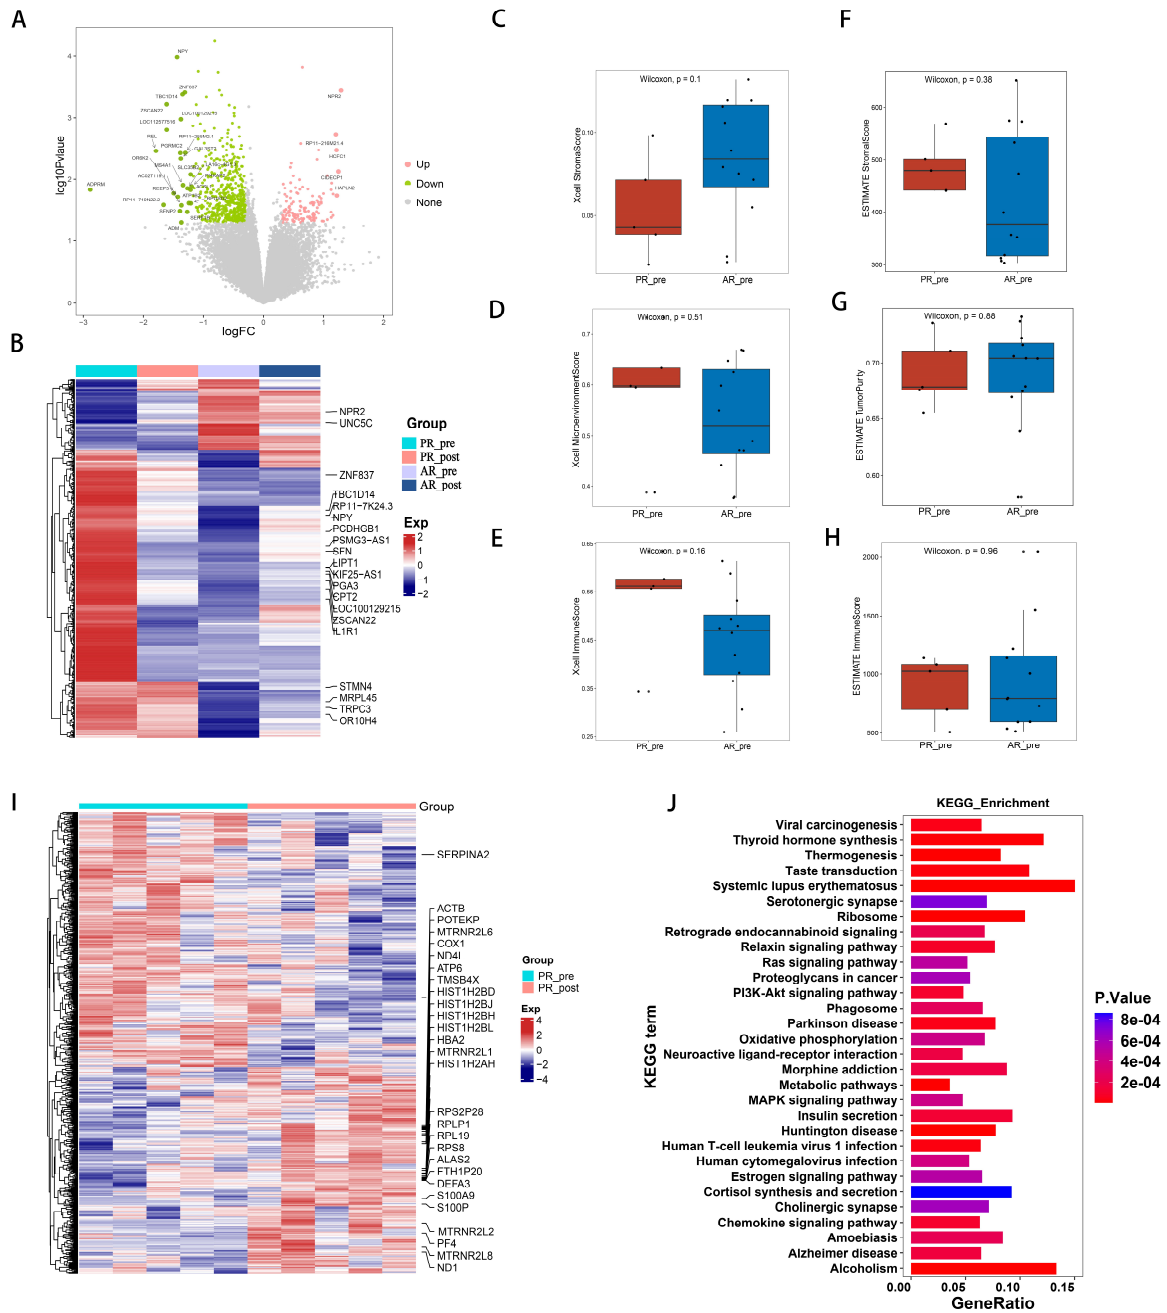

**Supplementary Figure S3.** (A) Volcano plots showing differences between PR\_pre and AR\_pre groups. (B) Heatmap analysis of mean expression of DEGs between PR\_pre and AR\_pre groups in four groups. (C-E) Boxplot showing xCell enrichment tumor purity, immune, and stromal scores between PR\_pre and AR\_pre groups. (F-H) Boxplot showing ESTIMATE enrichment scores of 14 stromal cells between PR\_pre and AR\_pre groups. (I) Heatmap analysis of DEGs between PR\_pre and PR\_post groups. (J) KEGG enrichment analysis of DEGs between PR\_pre and PR\_post groups.

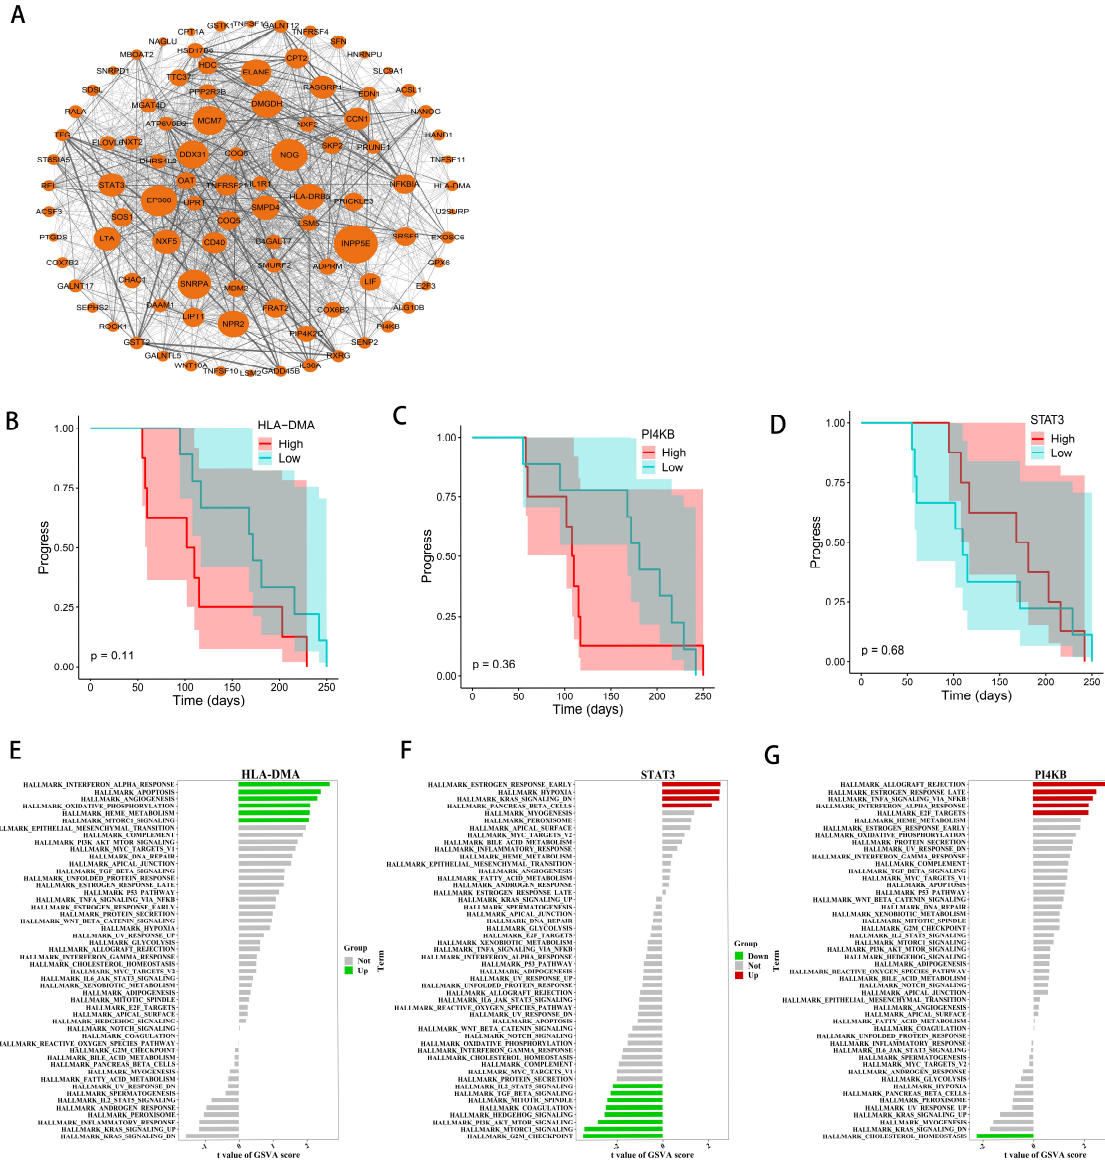

**Supplementary Figure S4.** (A) Network depicting co-expressed DEGs between PR<sub>pre</sub> and AR<sub>pre</sub> groups within cancer-associated KEGG pathways following WCGNA analysis. (B-D) Kaplan-Meier curve of *HLA-DMA*, *PI4KB* and *STAT3* with progression time. (E-G) GSEA of *HLA-DMA*, *PI4KB* and *STAT3*.

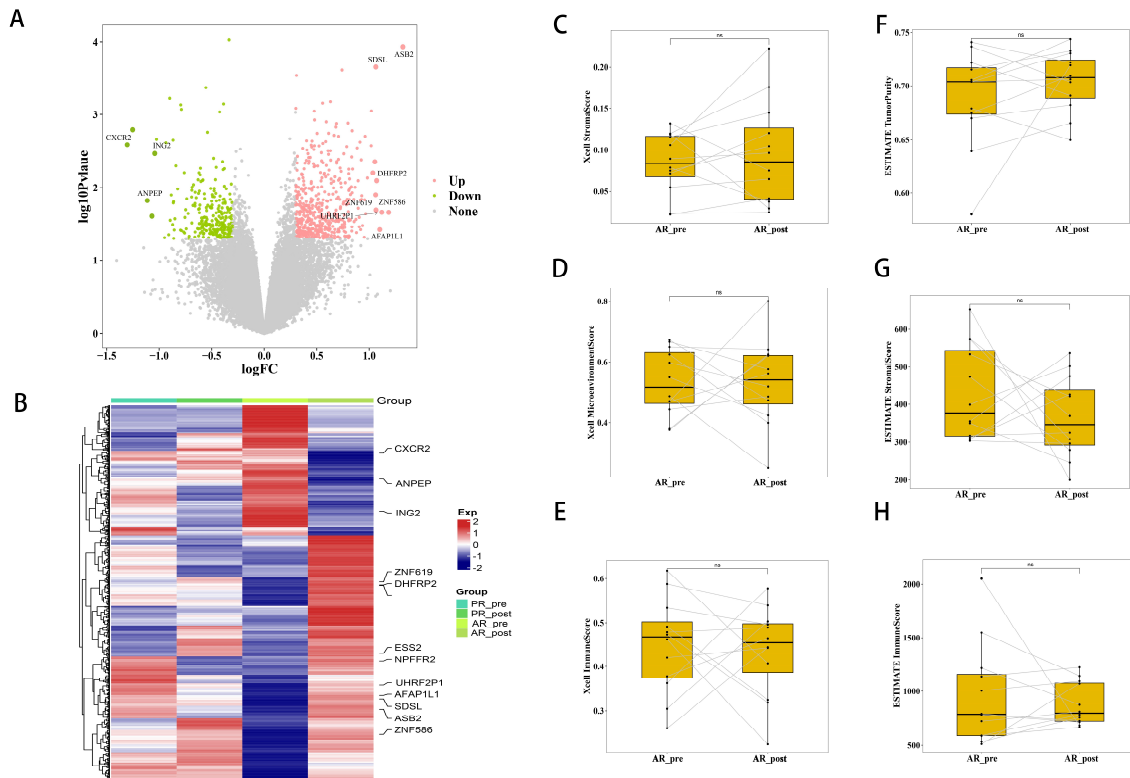

**Supplementary Figure S5.** (A) Volcano plots showing differences between AR\_pre and AR\_post groups. (B) Heatmap analysis of mean expression of DEGs between AR\_pre and AR\_post groups in four groups. (C-E) Boxplot showing xCell enrichment microenvironment, stromal, and immune scores between AR\_pre and AR\_post groups. (F-G) Boxplot showing ESTIMATE enrichment tumor purity, immune, and stromal scores between AR\_pre and AR\_post groups, where ns indicates not significant.

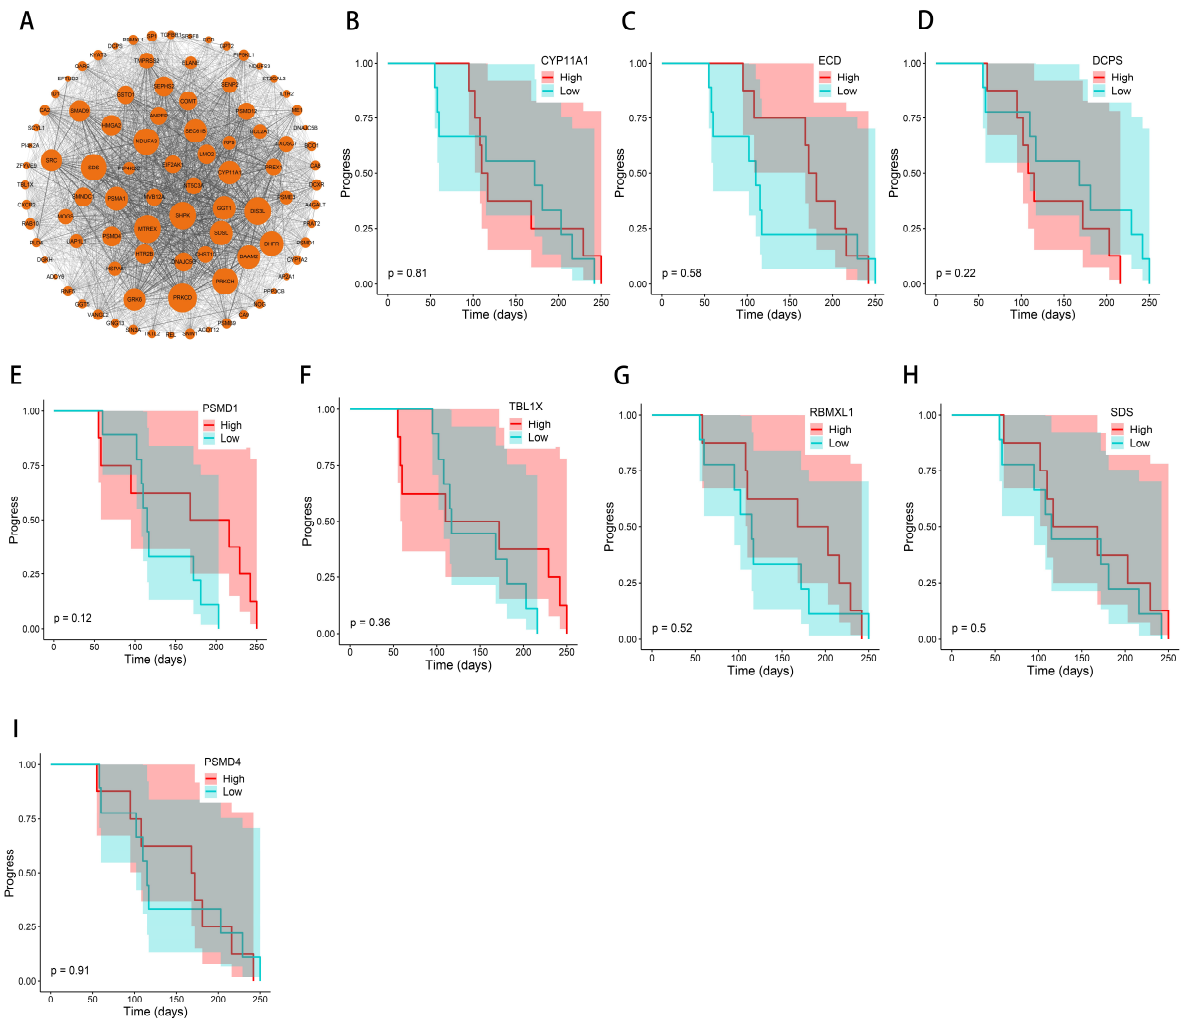

**Supplementary Figure S6.** (A) Network depicting co-expressed DEGs between AR\_pre and AR\_post groups within cancer-associated KEGG pathways following WCGNA analysis. (B-I) Kaplan-Meier curve of *CYP11A1*, *ECD*, *DCPS*, *PSMD1*, *TBL1X*, *PBMXL1*, *SDS*, and *PSMD4* with progression time.

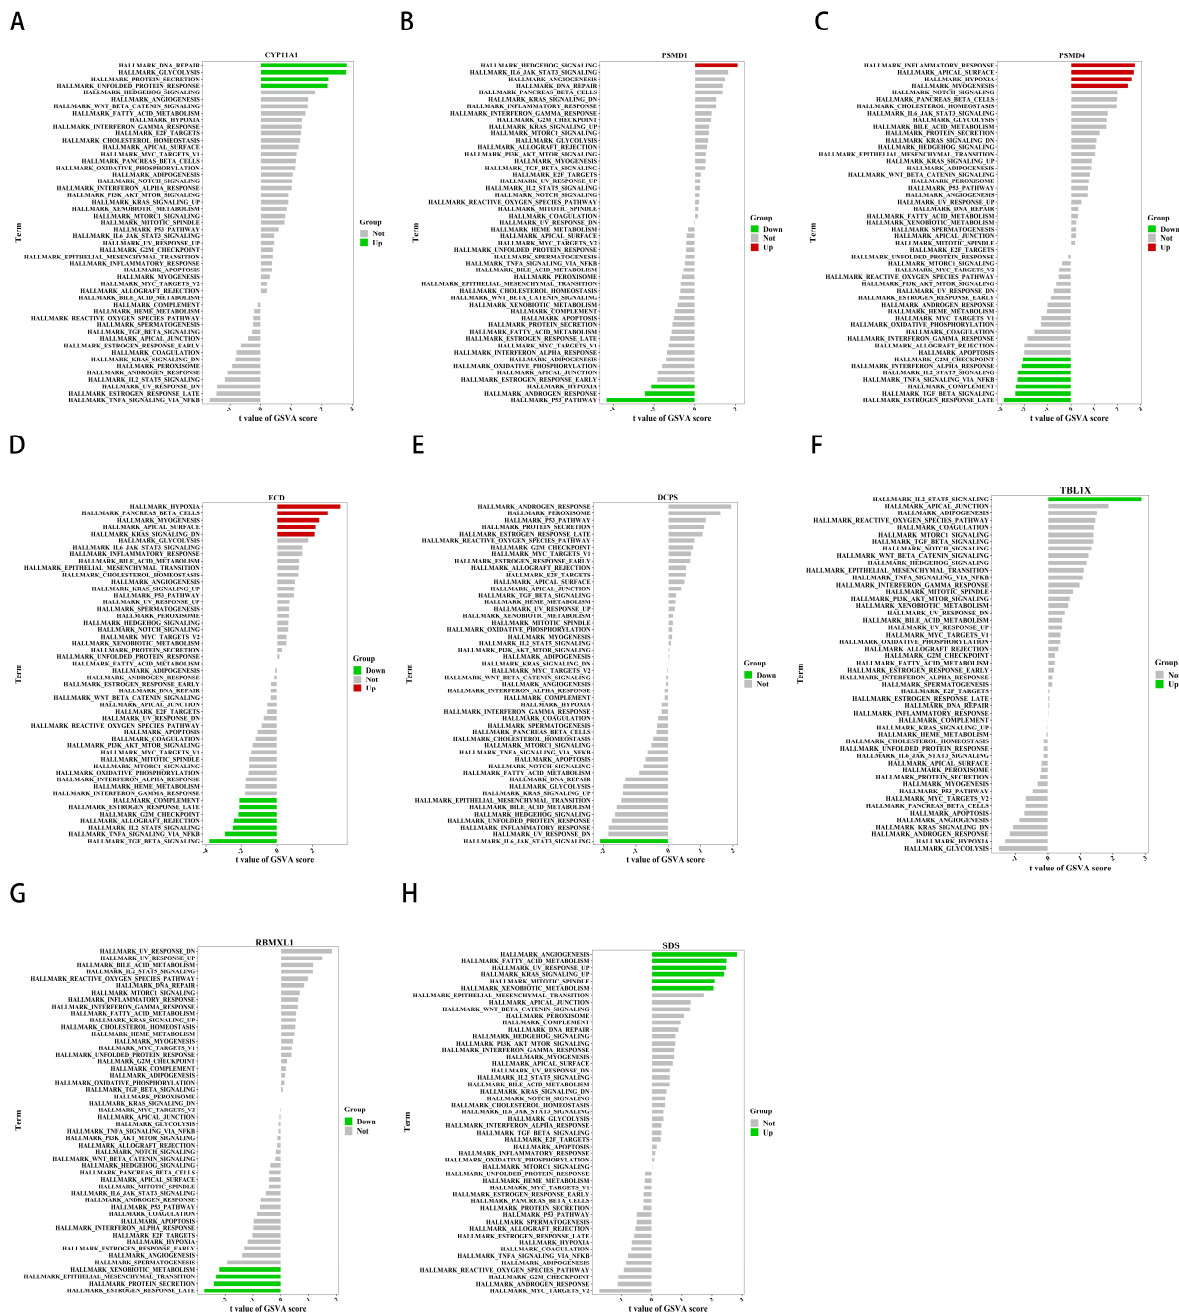

**Supplementary Figure S7. (A-H) GSEA of *CYP11A1*, *ECD*, *DCPS*, *PSMD1*, *TBLIX*, *PBMXL1*, *SDS*, and *PSMD4*.**
